# Supplementary material for: Functional conservation in human and Drosophila of Metazoan ADAR2 involved in RNA editing: loss of ADAR1 in insects
Source: PubMed Central journal article supplement — Nucleic Acids Res. 2011 May 27;39(16):7249–62. doi: 10.1093/nar/gkr423 (PMC3167634; doi:10.1093/nar/gkr423), 2011-05-27
Supplement: supp_gkr423_Supplementary_Data_Keegan_Revised.pdf [file supp_gkr423_Supplementary_Data_Keegan_Revised.pdf]

## Supplementary Data

### **Functional conservation in human and *Drosophila* of Metazoan ADAR2 involved in RNA editing: loss of ADAR1 in insects.**

Liam P. Keegan<sup>\*1</sup>, Leeane McGurk<sup>1</sup>, Juan Pablo Palavicini<sup>2</sup>, James Brindle<sup>1</sup>, Simona Paro<sup>1</sup>, Xianghua Li<sup>1</sup>, Joshua J.C. Rosenthal<sup>2</sup> and Mary A.O'Connell<sup>\*1</sup>.

<sup>1</sup>MRC Human Genetics Unit, Institute of Genetics and Molecular Medicine, Western General Hospital, Crewe Road, Edinburgh EH4 2XU, UK. <sup>2</sup>Institute of Neurobiology, University of Puerto Rico Medical Sciences Campus, San Juan, Puerto Rico 00901

**Supplementary Table.** Sequence of oligonucleotides used for RT and sequencing .

***Rdl***

|       |                            |
|-------|----------------------------|
| 657R  | AGCTGATCGATAGCACATACATGG   |
| 1381F | GCTCGTTATGGTCTTTGGCAGTC    |
| 1993F | TTCCAGCCCATCTTCTGCATCCGG   |
| 1042F | TCGGTGTCTCGAGTGAGGTTTCGC   |
| 1560R | CGCCCACATTTGCATTGGGATTGGG  |
| 540R  | CGTCACCCAGCATGCTGCCACCGCC  |
| 1680R | TGTGGGCGTGGTGTCCATGCCCGTG  |
| 489F  | CGGATCCATACAGTGCAAGCGG     |
| 1715R | CACTGTTTGCTTGGGCGCATGCGG   |
| 939R  | GTAGATTCATCGGACACGATGCGG   |
| 960R  | GGCGATCCATGGGGAAATATTGTAG  |
| 961F  | AGCTGTGCCACATTGAAATCGAAAGC |
| 541F  | TAAACATATCCGCTATTCTCGACTCC |

***Ca alpha 1D***

|       |                            |
|-------|----------------------------|
| 1774F | GCTGGCCAAAGAGACAACAACGCCGT |
| 2255R | CTTTAAAATTGAATTCAGCACAACTG |
| 2306R | GCAATGTGAAACAGTGGCACCATGGC |

***eag***

|       |                            |
|-------|----------------------------|
| 2674R | GACGAAATTTGGAGAAGATCTTCCGG |
| 1741F | CCGGGCCAGAATTGGTTAATGGGCCG |
| 2340R | CCACAACCTCGTCGTCCTGTATCAC  |
| 2700R | CCTTACTGCCCCGCTTGGACCTG    |
| 1768F | CACGGAAAAGCATGTACGTGACGG   |
| 2417F | GCGTGCTCTGACCTATTGTGATTTG  |

***nic 34E***

|       |                            |
|-------|----------------------------|
| 4241R | CAATTAACCACCTCGCCCATATGG   |
| 3433F | CGGGTGAAAAATTATCACTGGG     |
| 3391F | CATGGCCTTGCTCGGATTCCTGACC  |
| 4372R | CTTGGATGTATTATTTAGTTGATGG  |
| 4218R | CTACGAGACAATAATATGTGGTGCTG |
| 3589F | TCAACGATTTTAATATTAATTAT    |
| 3981F | GGTCACCCATCATACGTGCATCAC   |
| 3735R | GGTCGGGAACTCCAGGATCAGC     |

**Supplementary Table 2.** Invertebrate and human ADARs accession numbers used for the alignments/phylogenetic analysis.

| Common Name | Scientific name                         | (NCBI Accession Number) or {JGI Name or ID}                                  |
|-------------|-----------------------------------------|------------------------------------------------------------------------------|
| Acorn worm  | <i>Saccoglossus kowalevskii</i>         | ADAR1 (Translated from NW_003134359)<br>ADAR2 (XP_002740631)                 |
| Amphipod    | <i>Parhyale hawaiiensis</i>             | ADAR2 {Translated from AFHB17469.g2,<br>AFHB25923.g2}                        |
| Anemone     | <i>Nematostella vectensis</i>           | ADAR1 (XP_001642062)<br>ADAR2 (XP_001629615)                                 |
| Beetle      | <i>Tribolium castaneum</i>              | ADAR2 (XP_969823)                                                            |
| Coral       | <i>Acropora millepora</i>               | ADAR2 (Translated from EZ011992)                                             |
| Fly         | <i>Drosophila melanogaster</i>          | ADAR2 (AAF45665)                                                             |
| Human       | <i>Homo sapiens</i>                     | ADAR1 (NP_001102)<br>ADAR2 (NP_001103)                                       |
| Hydrozoan   | <i>Hydra magnipapillata</i>             | ADAR (XP_002166223)                                                          |
| Lancelet    | <i>Branchiostoma floridae</i>           | ADAR1 (XP_002605887) <sup>1</sup><br>ADAR2 (XP_002595015)                    |
| Leech       | <i>Helobdella robusta</i>               | ADAR1 {193655}<br>ADAR2 {167455}                                             |
| Louse       | <i>Pediculus humanus</i>                | ADAR2 (XP_002428026)                                                         |
| Mite        | <i>Varroa destructor</i>                | ADAR1 (Translated from ADDG01088043)<br>ADAR2 (Translated from ADDG01007263) |
| Nematode    | <i>Caenorhabditis elegans</i>           | Adr-1 (NP_492154)<br>Adr-2 (NP_498594)                                       |
| Octopus     | <i>Octopus vulgaris</i>                 | ADAR1 <sup>2</sup><br>ADAR2 <sup>3</sup>                                     |
| Polychaete  | <i>Capitella teleta</i>                 | ADAR1 {183692}<br>ADAR2 {JGI 176450}                                         |
| Slug        | <i>Aplysia californica</i>              | ADAR1 (Translated from AASC02013163)                                         |
| Limpet      | <i>Lottia gigantea</i>                  | ADAR1 {133644}<br>ADAR2 {128560}                                             |
| Sponge      | <i>Amphipredon queenslandica</i>        | No ADAR/ADAT found                                                           |
| Squid       | <i>Loligo opalescens, Loligo pealei</i> | ADAR1 <sup>2</sup><br>ADAR2 (ACO52475)                                       |
| Tick        | <i>Ixodes scapularis</i>                | ADAR1 (XP_002403965)<br>ADAR2 (XP_002434473)                                 |
| Trematode   | <i>Schistosoma mansoni</i>              | No ADAR found                                                                |
| Trichoplax  | <i>Trichoplax adhaerens</i>             | ADAT1 {55696}                                                                |
| Tunicate    | <i>Ciona intestinalis</i>               | ADAR1 (XP_002122509)<br>ADAR2 (XP_002128212)                                 |
| Urchin      | <i>Strongylocentrotus purpuratus</i>    | ADAR1 (XP_001183590)<br>ADAR2 (XP_781832)                                    |
| Water flea  | <i>Daphnia pulex</i>                    | ADAR2 {Translated from 211108}                                               |

1. Predicted protein XP\_002605887 had high similarity with ADAR1 consensus except for a poorly conserved region (residues 131-156). That specific region was blasted against *B. floridae* nucleotide database, and sequence ABEP02011549 appeared as a high score hit. Residues 131-266 were deleted from the predicted protein sequence and replaced by those translated from the nucleotide sequence. Residues 157-266 were >95% identical between both sequences, confirming that the replaced region is indeed homologous to ADAR1.

2. To be submitted to GenBank upon acceptance.

3. Kindly provided by L. Moroz (The Whitney Laboratory for Marine Bioscience, University of Florida) from an octopus EST library.

**Supplementary Figure 1. *In vitro* poisoned primer extension assay of hADAR2 and hADAR (S/G).**

A mutation was introduced in human ADAR2 to mimic the self-editing event found in exon 7 in *Drosophila* ADAR. A poisoned primer extension assay was performed with increasing amounts of purified recombinant proteins to measure RNA editing *in vitro* at the Q/R site in the *GluR2 B13* minigene transcript. The mutation in hADAR2 reduced editing activity eightfold which is the same reduction in activity that is observed with the *Drosophila* proteins.

**Supplementary Figure 2. Alignment of invertebrate ADARs with human ADAR1 and ADAR2.**

Only the core deaminase domain was used for the alignment. Positions that were defined as characteristic of vertebrate ADAR1 or ADAR2 by (1) are highlighted in red and blue, respectively. Residues that chelate zinc at the catalytic core are highlighted in black. All invertebrate ADAR sequences should be considered putative except for fruit fly and squid ADAR2.

**Supplementary Figure 3. Phylogenetic tree of metazoan ADAR sequences.**

Nodes include bootstrap values (n=1000). The tree was generated using the complete deaminase domain sequences and the *Trichoplax* ADAT sequence as an out group.

## **Reference**

1. Keegan, L.P., Leroy, A., Sproul, D. and O'Connell, M.A. (2004) Adenosine deaminases acting on RNA (ADARs): RNA-editing enzymes. *Genome Biol*, **5**, 209.

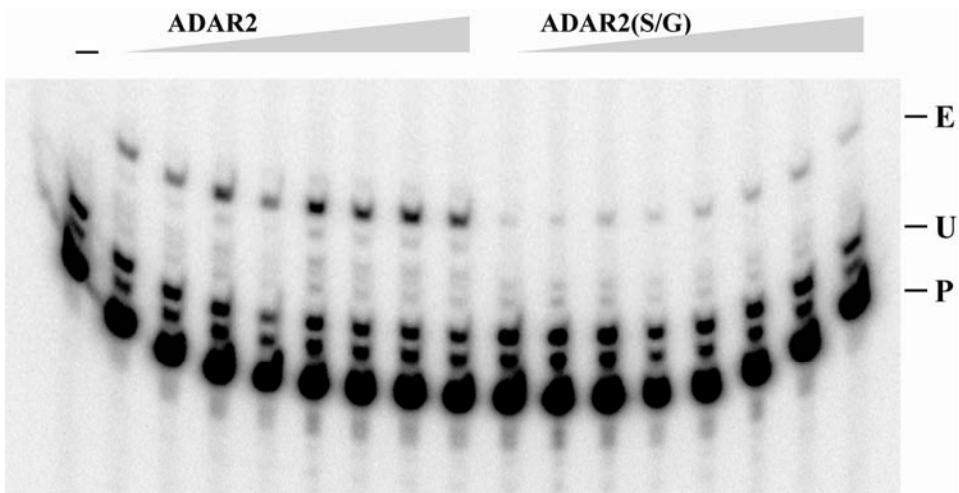

*GluR2 B13 minigene Q/R site*

Figure S1

```

10      20      30      40      50
Acom_worm_ADAR1  ---G-NR-CV-TGDM-SL-EGH-TV-NDSH-AE-I-TRRS-FLR-
Urchin_ADAR1    V-SL-ETGN-R-CV-TGDK-L-SMEGR-TV-NDSH-AE-I-TRRA-FLRYL-YNQLQAY- --KNET-I-L-TQG
Mite_ADAR1
Tick_ADAR1      V-C-F-E-T-G-S-R-I-T-G-C-L-S-D-G-T-V-NDSH-AE-V-I-TRRS-FLR-FL-YQQL-KS-YG- --PEHA-I-L-E-P-T
Leech_ADAR1     ---G-NR-C-I-S-S-Q-H-S-L-D-G-L-S-NDSH-AE-V-I-VRR-FLRY-
Polychaete_ADAR1 V-C-I-E-T-G-N-R-C-I-T-G-T-Y-M-S-L-E-G-A-T-V-NDSH-AE-V-I-TRRC-FLR-FL-YHQL-LNYS- --R-D-T-I-L-C-P-G
Anemone_ADAR1   V-S-L-E-A-G-N-R-C-V-T-G-Q-R-S-M-E-G-K-V-NDSH-AE-I-I-ARRS-FLR-FL-YAQL-HA-HF- --DKS-I-F-E-K-R-N
Slug_ADAR1      ---G-NR-CV-TGDK-S-L-H-G-H-T-V-NDSH-AE-V-I-TRR-FLR-FL-YQQL-QT-QY- --LDH-PL-F-E-P-S
Limpet_ADAR1    V-S-V-S-G-N-R-C-I-T-G-E-E-S-L-E-G-N-T-V-NDSH-AE-I-I-TRR-FLR-FL-YQQL-L-T-Y-T- --TPHE-F-F-E-G
Tunicate_ADAR1  V-S-L-S-G-N-R-C-V-P-G-D-Q-S-L-C-G-E-T-V-NDSH-AE-I-I-ARR-FLR-FL-YK-Q-I-F-D-F-Q-N-D-L-T-K-T-I-F-V-G
Lancelet_ADAR1  V-A-M-T-G-S-C-L-M-G-K-N-I-G-T-D-G-R-T-V-NDSH-AE-V-V-V-R-R-S-FLR-FL-YR-L-K-N-V-L- --EGS-I-F-E-K-H
Octopus_ADAR1   V-S-V-T-G-N-R-C-L-T-G-D-R-S-L-E-G-N-S-V-NDSH-AE-M-V-T-R-R-FLR-FL-YR-H-L-L-E-Y-D- --APND-L-F-E-K-G
Squid_ADAR1     V-S-V-T-G-N-R-C-L-T-G-D-H-S-L-E-G-N-S-V-NDSH-AE-M-I-T-R-R-FLR-FL-YK-H-L-L-E-Y-D- --PPHD-L-F-E-K-G
Human_ADAR1     V-S-L-T-G-N-R-C-V-K-G-D-S-S-L-K-G-E-T-V-NDSH-AE-I-I-S-R-R-FLR-FL-Y-S-L-M-K-Y-N-S- --QKDS-I-F-E-P-A
Human_ADAR2     V-S-V-S-T-G-N-K-C-I-N-G-E-Y-M-S-R-C-L-A-N-D-H-AE-I-I-S-R-R-FLR-FL-Y-T-Q-L-L-V-L-N-N-K-D-K-R-S-I-F-O-K-S
Fly_ADAR2       V-S-V-S-T-G-N-K-C-V-S-G-E-L-S-V-N-G-A-V-NDSH-AE-I-V-S-R-R-FLR-FL-Y-Q-L-D-L-Q-C-N-A-T-A-Y-G-S-I-F-V-R-N
Squid_ADAR2     V-G-I-E-T-G-N-K-C-I-N-G-E-Y-M-S-R-G-F-A-N-D-H-AE-I-I-ARR-FLR-F-I-Y-D-Q-L-L-H-L-S-N-A-E-G-Q-S-I-F-FLR
Octopus_ADAR2   ---G-F-G-V-NDSH-AE-I-I-ARR-FLR-Y-I-Y-D-Q-L-L-H-L-S-N-P-D-N-S-I-F-FLR
Acom_worm_ADAR2 V-C-V-S-T-G-N-K-C-I-N-G-E-Y-M-S-Q-G-L-A-N-D-H-AE-I-V-T-R-R-S-V-H-Y-L-Y-T-Q-L-L-H-L-T-N-E-G-D-K-S-I-F-O-P-C
Urchin_ADAR2    V-I-T-I-S-T-G-N-K-C-I-N-G-E-Y-M-S-Q-G-L-A-N-D-H-AE-I-I-S-R-R-FLR-FL-Y-S-Q-K-L-F-L-D-N-Q-G-E-S-S-I-F-V-P-H
Lancelet_ADAR2  V-S-L-A-T-G-N-K-C-I-N-G-E-Y-M-S-V-K-G-K-A-N-D-H-AE-I-V-S-R-R-FLR-FL-Y-S-Q-L-D-L-L-E-G-V-K-E-E-S-I-F-E-S-K
Tunicate_ADAR2  V-S-V-A-T-G-N-K-C-I-N-G-E-Y-I-S-Q-G-S-A-L-F-D-H-AE-I-V-A-K-R-FLR-FL-Y-E-Q-L-L-S-L-P-Q-T-D-P-I-F-E-L
Mite_ADAR2      I-L-C-I-T-T-G-N-K-C-L-S-G-K-Y-L-A-M-E-G-S-A-L-F-D-H-G-E-I-L-A-R-R-C-F-K-F-L-L-Y-Q-Q-L-D-T-Y-
Tick_ADAR2      V-M-T-V-A-T-G-N-K-C-I-N-G-E-Y-I-S-M-N-G-A-V-L-D-H-AE-V-V-S-R-R-C-K-D-F-L-Y-Q-Q-L-L-W-Q-K-G-R-G-E-S-V-L-E-R
Beetle_ADAR2    I-S-V-T-T-G-N-K-C-I-S-G-E-H-I-S-M-N-G-C-S-L-N-D-H-AE-I-I-S-R-R-C-I-T-Y-F-Y-D-Q-L-L-I-A-N-S-Q-P-E-K-S-I-F-T-Q-R
Louse_ADAR2     V-L-T-V-S-T-G-N-K-C-I-S-G-D-R-I-S-A-N-G-S-V-NDSH-AE-I-I-S-R-R-C-N-Y-F-Y-S-E-L-K-Y-V-K-D-T-G-R-N-S-I-F-L-K-S
Amphipod_ADAR2 V-S-L-C-G-T-K-C-L-G-D-S-E-W-C-P-R-G-R-S-V-H-D-S-H-AE-V-L-A-K-R-F-O-R-Y-L-M-D-Q-
Water_flea_ADAR2 V-C-V-T-T-G-S-K-C-I-N-G-G-C-L-S-M-E-G-E-A-N-D-H-AE-V-L-A-R-R-C-V-S-Y-L-Y-D-Q-L-N-I-G-S-
Limpet_ADAR2    V-S-V-A-T-G-N-K-C-I-N-G-E-Y-M-S-Q-G-L-S-N-D-H-AE-I-I-ARRS-FLR-FL-Y-F-A-Q-L-Q-L-L-D-Q-A-E-N-S-I-F-E-R-N
Leech_ADAR2     L-S-L-A-S-G-T-K-C-I-N-G-E-F-I-S-N-N-G-R-A-I-N-D-H-AE-I-L-A-R-R-C-K-N-F-L-Q-Q-L-N-L-F-F-S-C-E-T-D-D-V-I-F-D-V-H
Polychaete_ADAR2 V-S-V-T-T-G-N-K-C-I-N-G-E-Y-I-N-D-R-G-C-A-L-N-D-H-AE-I-L-A-R-R-C-L-R-R-Y-F-Q-Q-L-S-R-A-A-N-S-T-A-Q-Q-S-I-F-E-A-R
Coral_ADAR2     V-S-L-E-T-G-T-K-F-I-C-G-E-Y-M-S-Q-G-L-A-N-D-H-G-E-I-I-ARRS-FLR-FL-F-S-Q-L-L-C-A-E-G-Y-E-E-D-S-I-F-E-K-K
Anemone_ADAR2   M-S-I-E-T-G-T-K-F-I-S-G-E-Y-I-S-K-G-Y-A-N-D-H-G-E-I-I-ARR-FLR-FL-FL-Y-N-Q-L-L-C-V-Q-G-D-N-S-S-I-F-E-K-L

70      80      90      100     110
Acom_worm_ADAR1  ---G-L-L-R-T-K-M-E-G-G
Urchin_ADAR1    T-N-G-K-L-R-L-P-D-V-S-L-H-L-Y-I-S-T-A-P-C-G-D-S-A-O-F-S-R-T-D-A-E-N-G-P-G-D-H-L-P-T-F-E-K-T-S-G-L-L-R-T-K-M-E-G-G
Mite_ADAR1
Tick_ADAR1      E-D-G-E-K-I-R-M-P-D-V-T-F-H-L-Y-I-S-T-A-P-C-G-D-S-A-L-F-A-H-T-T-K-D-D-K-T-Q-H-P-I-L-T-K-S-C-G-L-L-R-T-K-L-E-A-G
Leech_ADAR1
Polychaete_ADAR1 S-G-N-R-L-R-I-K-D-Q-C-S-L-H-L-Y-I-S-T-A-P-C-G-D-S-A-L-F-S-P-R-D-S-N-T-Q-S-H-K-P-T-F-T-S-K-V-G-I-L-R-T-K-M-E-S-G
Anemone_ADAR1    N-S-R-L-R-A-V-R-G-Q-V-S-F-H-L-Y-I-S-T-A-P-C-G-D-S-A-L-F-T-P-R-E-G-N-T-D-L-H-K-P-A-F-T-S-K-L-G-I-L-R-T-K-M-E-D-G
Slug_ADAR1       Q-S-G-K-L-K-V-K-D-S-V-T-F-H-L-Y-I-S-T-A-P-C-G-D-S-A-L-F-S-P-R-L-V-F-T- --H-R-P-T-V-G-S-A-C-G-L-L-R-T-K-M-E-G-G
Limpet_ADAR1    P-S-G-K-L-R-I-K-S-N-F-T-F-H-L-Y-I-S-T-A-P-C-G-D-S-A-L-F-S-P-R-D-A-S-N-G-P-E-H-N-P-T-I-S-N-V-G-V-L-R-T-K-M-E-G-G
Tunicate_ADAR1  E-Y-N-R-L-K-K-H-G-I-G-H-L-Y-I-S-T-T-P-C-D-S-I-F-A-T-S-D-V-S-V-E-N-H-Y-P-I-M-E-N-R-K-C-G-I-L-R-T-K-M-E-K-G
Lancelet_ADAR1  S-D-S-L-L-V-M-K-E-G-V-S-F-H-L-Y-L-T-T-A-P-C-G-D-A-A-T-H-I-T-R-D-D-T-R-T-O-D-S-H-K-P-T-D-S-V-O-H-G-A-L-S-I-K-G-O-A-G
Octopus_ADAR1   E-R-S-I-C-R-I-K-T-N-I-T-F-H-L-Y-I-S-T-A-P-C-G-D-S-A-L-F-S-P-R-D-T-S-S-A-K-E-H-N-P-T-F-S-S-V-G-L-L-R-T-K-M-E-G-G
Squid_ADAR1     E-R-S-L-C-R-I-K-T-N-I-T-F-H-L-Y-I-S-T-A-P-C-G-D-S-A-L-F-S-P-R-D-T-S-S-V-K-D-H-N-P-T-F-S-S-V-G-L-L-R-T-K-M-E-G-G
Human_ADAR1     K-G-E-K-I-Q-I-K-K-T-V-S-F-H-L-Y-I-S-T-A-P-C-G-D-S-A-L-F-K-S-C-S-R-A-M-E-T-H-Y-V-Y-E-M-P-K-O-C-K-L-R-T-K-M-E-N-G
Human_ADAR2     E-R-G-E-F-R-K-E-N-V-F-H-L-Y-I-S-T-S-P-C-D-A-R-I-F-S-P-H-E-P-I-L- --E-A-D-R-H-P-N-R-K-A-R-G-L-R-T-K-M-E-S-G
Fly_ADAR2       T-D-Q-Q-Y-K-K-G-V-H-F-H-L-Y-I-N-T-A-P-C-D-A-R-I-F-S-P-H-E-N-D- --T-V-K-H-P-N-R-K-A-R-G-L-R-T-K-M-E-S-C
Squid_ADAR2     D-A-G-E-Y-K-K-P-N-I-F-H-L-Y-I-S-T-A-P-C-D-A-R-I-F-S-P-H-G-Q-D-V- --T-G-R-H-P-N-R-K-A-R-G-L-R-T-K-M-E-S-G
Octopus_ADAR2   E-K-G-E-Y-Q-K-E-N-I-F-H-L-Y-I-S-T-A-P-C-D-A-R-I-F-S-P-H-G-Q-D-V- --T-G-R-H-P-N-R-K-
Acom_worm_ADAR2 D-G-G-E-Y-K-I-R-S-D-V-L-F-H-L-Y-I-S-T-S-P-C-D-A-R-I-F-S-P-H-E-I-T-S- --E-T-D-R-H-P-N-R-K-A-R-G-L-R-T-K-M-E-S-G
Urchin_ADAR2    P-S-G-E-Y-K-I-R-S-D-I-K-F-H-L-Y-I-S-T-A-P-C-D-A-R-I-F-S-P-H-E-S-C- --S-E-P-D-R-H-P-N-R-R-A-R-G-L-R-T-K-M-E-S-G
Lancelet_ADAR2 E-D-G-E-Y-R-L-K-D-D-V-E-F-H-L-Y-I-S-T-S-P-C-D-A-R-I-F-S-P-H-E-A-D-T- --D-A-A-R-H-P-N-R-K-A-R-G-L-R-T-K-M-E-G
Tunicate_ADAR2  P-T-G-E-Y-K-V-P-D-V-Y-F-H-L-Y-I-N-T-S-P-C-D-A-R-I-F-S-P-H-E-T-K- --D-G-N-H-P-N-R-K-S-A-R-G-L-R-T-K-M-E-G
Mite_ADAR2      ---K-P-G-I-L-H-L-F-I-S-T-S-P-C-D-G-R-I-F-A-N-E-K-A-C- --T-E-M-P-R-N-A-G-R-A-S-G-V-L-R-T-K-M-E-G-G
Tick_ADAR2      Q-G-G-E-F-R-I-K-P-I-K-F-H-L-Y-I-S-T-S-P-C-D-G-R-I-F-S-P-H-E-L-D-S- --A-E-A-D-R-H-P-N-R-R-V-G-L-L-R-T-K-M-E-A-G
Beetle_ADAR2    E-D-G-E-Y-K-I-K-P-G-L-D-F-H-L-Y-I-N-T-A-P-C-D-A-R-I-F-S-P-H-E-S- --E-V-K-H-P-N-R-K-C-S-A-R-G-L-R-T-K-M-E-S-G
Louse_ADAR2     P-N-K-E-F-L-I-D-P-K-Y-F-H-L-Y-I-T-S-A-P-C-D-S-L-F-S-P-H-D-V-C- --F-K-H-P-N-R-K-A-R-G-L-R-T-K-M-E-R-G
Amphipod_ADAR2 ---Q-V-K-D-G-I-T-F-H-F-Y-V-S-S-T-P-C-D-R-S-V-F-P-Q-N-F-L-D- --V-S-V-H-P-N-R-L-C-G-L-L-R-T-K-M-E-C-G
Water_flea_ADAR2 -Q-N- --L-K-T-K-S-D-V-L-F-H-L-Y-V-S-S-A-P-C-D-A-R-I-F-T-L-N-E-S-L-A- --S-P-E-D-L-H-P-N-R-O-G-A-L-R-T-K-M-E-S-G
Limpet_ADAR2    G-D-A-E-F-Q-K-E-N-I-K-F-H-L-Y-I-N-T-A-P-C-D-A-R-I-F-S-P-H-E-A-E-M- --K-A-G-R-H-P-N-R-K-A-R-G-L-R-T-K-M-E-S-G
Leech_ADAR2     S-S-G-E-C-V-K-P-S-V-K-F-H-L-Y-V-S-T-S-P-C-D-A-R-I-F-S-P-H-E-Q-K-E-E-A-E-A-Q-S-A-K-K-L-A-R-G-I-L-R-T-K-M-E-S-G
Polychaete_ADAR2 E-G-G-E-Y-K-I-P-G-I-E-F-H-L-Y-I-S-T-S-P-C-D-A-R-I-F-S-P-H-E-A-Q-D- --A-D-K-D-P-H-P-N-R-K-A-R-G-L-R-T-K-M-E-S-G
Coral_ADAR2     D-S-G-L-Y-G-V-R-D-Y-V-E-F-H-L-Y-I-N-T-S-P-C-D-A-R-I-F-S-P-H-E-P-V-M- --G-V-A-D-K-H-P-C-R-T-R-L-L-R-V-K-L-E-N-G
Anemone_ADAR2   P-S-G-L-Y-G-L-K-D-Q-V-E-F-H-L-Y-I-S-T-S-P-C-D-A-R-V-F-S-P-H-E-G-D-P- --E-I-D-R-H-A-N-S-K-K-R-G-I-L-R-V-K-M-E-N-G

130     140     150     160     170
Acom_worm_ADAR1 E-G-T-I-P-I-D-P-E-S-S-V-C-T-W-D-G-I-R-G-E-R-L-R-T-M-S-C-S-D-K-I-A-R-W-N-L-L-G-Q-G-A-L-L-T-H-F-I-Q-P-I-Y-I
Urchin_ADAR1    E-G-T-I-P-V-T-T-R-E-S-V-C-T-W-D-G-I-M-R-G-E-R-L-R-T-M-S-C-S-D-K-V-A-W-N-L-L-G-Q-G-A-L-L-S-H-F-I-E-P-M-Y-I
Mite_ADAR1     E-G-T-V-P-D-V-D-S-T-D-Y-T-W-D-A-I-L-G-E-R-L-R-T-M-S-C-S-D-K-I-A-R-W-N-V-L-G-M-Q-G-L-L-S-H-F-L-Q-P-V-Y-L
Tick_ADAR1     E-G-T-V-P-V-D-L-T-T-D-Y-T-W-D-A-I-L-G-E-R-L-R-T-M-S-C-S-D-K-I-A-R-W-N-V-L-G-Q-G-A-L-L-S-H-F-L-Q-P-V-Y-I
Leech_ADAR1
Polychaete_ADAR1 E-G-T-I-P-I-E-D-F-V-S-T-W-D-G-I-L-R-G-E-R-L-R-T-M-S-C-S-D-K-V-C-R-W-N-V-L-G-M-Q-G-A-L-L-S-H-F-I-E-P-V-Y-I
Anemone_ADAR1   E-G-T-I-P-V-D-P-S-D-G-P-T-W-D-G-L-V-C-G-R-L-R-T-M-S-C-S-D-K-I-C-R-W-N-A-L-G-Q-G-A-L-L-S-H-F-I-E-P-V-Y-I
Slug_ADAR1      E-G-T-I-P-I-N-S-S-D-G-C-T-W-D-G-I-L-R-G-E-R-L-R-T-M-S-C-S-D-K-I-C-R-W-N-V-L-G-M-Q-G-A-L-L-S-H-F-L-D-P-V-Y-M
Limpet_ADAR1    E-G-T-I-P-I-E-S-D-F-T-V-C-T-W-D-G-I-V-R-G-E-R-L-R-T-M-S-C-T-D-K-I-C-R-W-N-V-V-G-M-Q-G-A-L-L-S-H-I-E-P-V-Y-I
Tunicate_ADAR1  E-G-C-I-P- --T-S-D-N-I-V-T-W-D-G-L-V-R-G-E-R-L-R-I-M-S-C-D-K-I-K-W-N-F-A-G-Q-G-A-L-L-N-T-F-I-E-P-I-Y
Lancelet_ADAR1  F-S-T-R-P-L-N-K-G-A-K-L-Y-T-W-D-Q-L-R-G-T-D-Q-I-G-T-M-S-C-S-D-K-L-K-W-N-V-L-G-Q-G-A-L-L-S-H-F-I-E-P-V-Y-I
Octopus_ADAR1  E-G-T-I-P-I-D-A-D-F-T-E-T-W-D-G-I-O-R-G-E-R-L-R-T-M-S-C-S-D-K-I-C-R-W-N-V-V-G-Q-G-A-L-L-S-H-F-I-E-P-I-Y
Squid_ADAR1     E-G-T-I-P-I-D-A-D-F-T-E-T-W-D-G-I-O-R-G-E-R-L-R-T-M-S-C-S-D-K-I-C-R-W-N-V-V-G-Q-G-A-L-L-S-H-F-V-E-P-I-Y
Human_ADAR1     E-G-T-I-P-V-E-S-S-D-I-V-P-T-W-D-G-I-R-L-G-E-R-L-R-T-M-S-C-S-D-K-I-A-R-W-N-V-L-G-Q-G-A-L-L-T-F-L-Q-P-I-Y
Human_ADAR2     E-G-T-I-P-V-S-S-N-A-S-I-C-T-W-D-G-V-L-G-E-R-L-L-T-M-S-C-S-D-K-I-A-R-W-N-V-V-G-I-Q-S-L-L-S-I-F-V-E-P-I-Y
Fly_ADAR2       E-G-T-I-P-V-K-S-S-D-G-C-T-W-D-G-V-L-G-Q-R-L-L-T-M-S-C-S-D-K-I-A-R-W-N-I-V-G-I-Q-S-L-L-S-S-I-E-P-V-Y-I
Squid_ADAR2     E-G-T-I-P-V-S-S-S-G-F-C-T-W-D-G-V-L-G-E-R-L-L-T-M-S-C-S-D-K-I-A-R-W-N-V-L-G-V-Q-G-A-L-L-C-H-F-M-H-P-I-Y
Octopus_ADAR2   ---E-R-L-T-M-S-C-S-D-K-I-A-R-W-N-V-L-G-I-Q-S-L-L-S-H-F-M-N-P-I-Y
Acom_worm_ADAR2 E-G-T-I-P-V-K-P-D-S-S-I-C-T-W-D-G-V-L-G-E-R-L-L-T-M-S-C-S-D-K-I-A-R-W-N-V-L-G-I-Q-G-A-L-L-S-N-F-I-E-P-V-Y-I
Urchin_ADAR2    E-G-T-I-P-V-K-S-G-P-S-I-C-T-W-D-G-V-L-G-E-R-L-L-T-M-S-C-S-D-K-L-A-R-W-N-V-L-G-V-Q-G-S-L-L-T-F-I-E-P-I-Y-I
Lancelet_ADAR2  E-G-T-I-P-V-T-S-S-S-S-V-C-T-W-D-G-V-L-G-E-R-L-L-T-M-S-C-S-D-K-I-A-R-W-N-V-L-G-I-Q-G-A-L-L-S-Y-F-E-P-I-Y
Tunicate_ADAR2  E-G-T-I-P-V-E-R-G-M-C-T-W-D-A-I-T-G-E-R-L-L-T-M-S-C-S-D-K-I-K-W-N-V-V-G-I-Q-S-L-L-S-M-Y-I-E-P-V-Y-I
Mite_ADAR2      E-G-T-I-P-L-P-A-S-F-T-V-C-T-W-D-G-I-N-G-D-R-L-L-T-H-S-C-S-D-K-L-A-R-W-N-V-L-G-Q-G-A-L-L-S-H-F-V-H-P-V-Y-I
Tick_ADAR2      E-G-T-I-P-L-L-G-P-V-M-C-T-W-D-G-V-L-H-G-Q-R-L-L-T-M-S-C-S-D-K-L-A-R-W-N-V-L-G-Q-G-S-L-L-S-L-F-M-E-P-V-Y-I
Beetle_ADAR2    E-G-T-I-P-V-K-A-S-G-L-I-C-T-W-D-G-I-L-G-E-R-L-L-T-M-S-C-S-D-K-I-C-R-W-N-V-V-G-V-Q-G-A-L-L-S-H-F-I-E-P-I-Y
Louse_ADAR2     E-G-T-I-P-V-N-S-D-L-I-C-T-W-D-G-V-L-G-E-R-L-L-T-M-S-C-S-D-K-L-K-W-N-V-V-G-V-Q-G-A-L-L-S-N-F-I-Q-P-V-Y-I
Amphipod_ADAR2 E-G-T-I-P-I-K- --E-S-V-C-T-W-D-G-V-M-C-G-E-R-L-L-T-M-S-C-S-D-K-L-A-R-W-N-V-L-G-I-Q-G-L-L-S-H-F-Y-M-P-V-Y-I
Water_flea_ADAR2 E-G-T-I-P-V- --N-E-S-I-C-T-W-D-G-I-L-S-G-E-R-L-L-T-M-S-C-S-D-K-L-A-R-W-N-V-V-G-I-Q-S-L-L-S-N-L-I-D-P-I-Y
Limpet_ADAR2    E-G-T-I-P-V-S-N-G-T-T-C-T-W-D-G-V-L-G-E-R-L-L-T-M-S-C-S-D-K-I-A-R-W-N-V-L-G-I-Q-S-L-L-S-V-S-F-V-K-P-I-Y
Leech_ADAR2     E-G-T-I-P-V-T-S-H-E-G-V-S-W-D-G-I-L-G-R-L-L-I-M-S-C-S-D-K-V-A-R-W-N-V-L-G-C-Q-G-S-L-L-S-H-F-V-L-P-I-Y
Polychaete_ADAR2 E-G-T-I-P-V-K-S-C-S-V-I-C-T-W-D-G-V-L-G-Q-R-L-L-T-M-S-C-S-D-K-L-S-K-W-V-L-G-V-Q-G-A-L-L-S-H-F-I-E-P-V-Y-I
Coral_ADAR2     E-G-T-I-P-A-I-N-G-V-I-C-T-W-D-G-V-L-G-E-R-L-L-T-M-S-C-S-D-K-L-C-R-W-N-V-T-G-I-Q-S-L-L-S-H-F-V-E-P-I-Y
Anemone_ADAR2  E-G-T-I-P-V-A-N-C-D-A-I-C-T-W-D-G-I-T-G-E-K-L-R-T-M-S-C-S-D-K-I-C-K-W-N-T-L-G-V-Q-G-A-L-L-S-H-F-I-E-P-V-Y-I

```

Figure S2

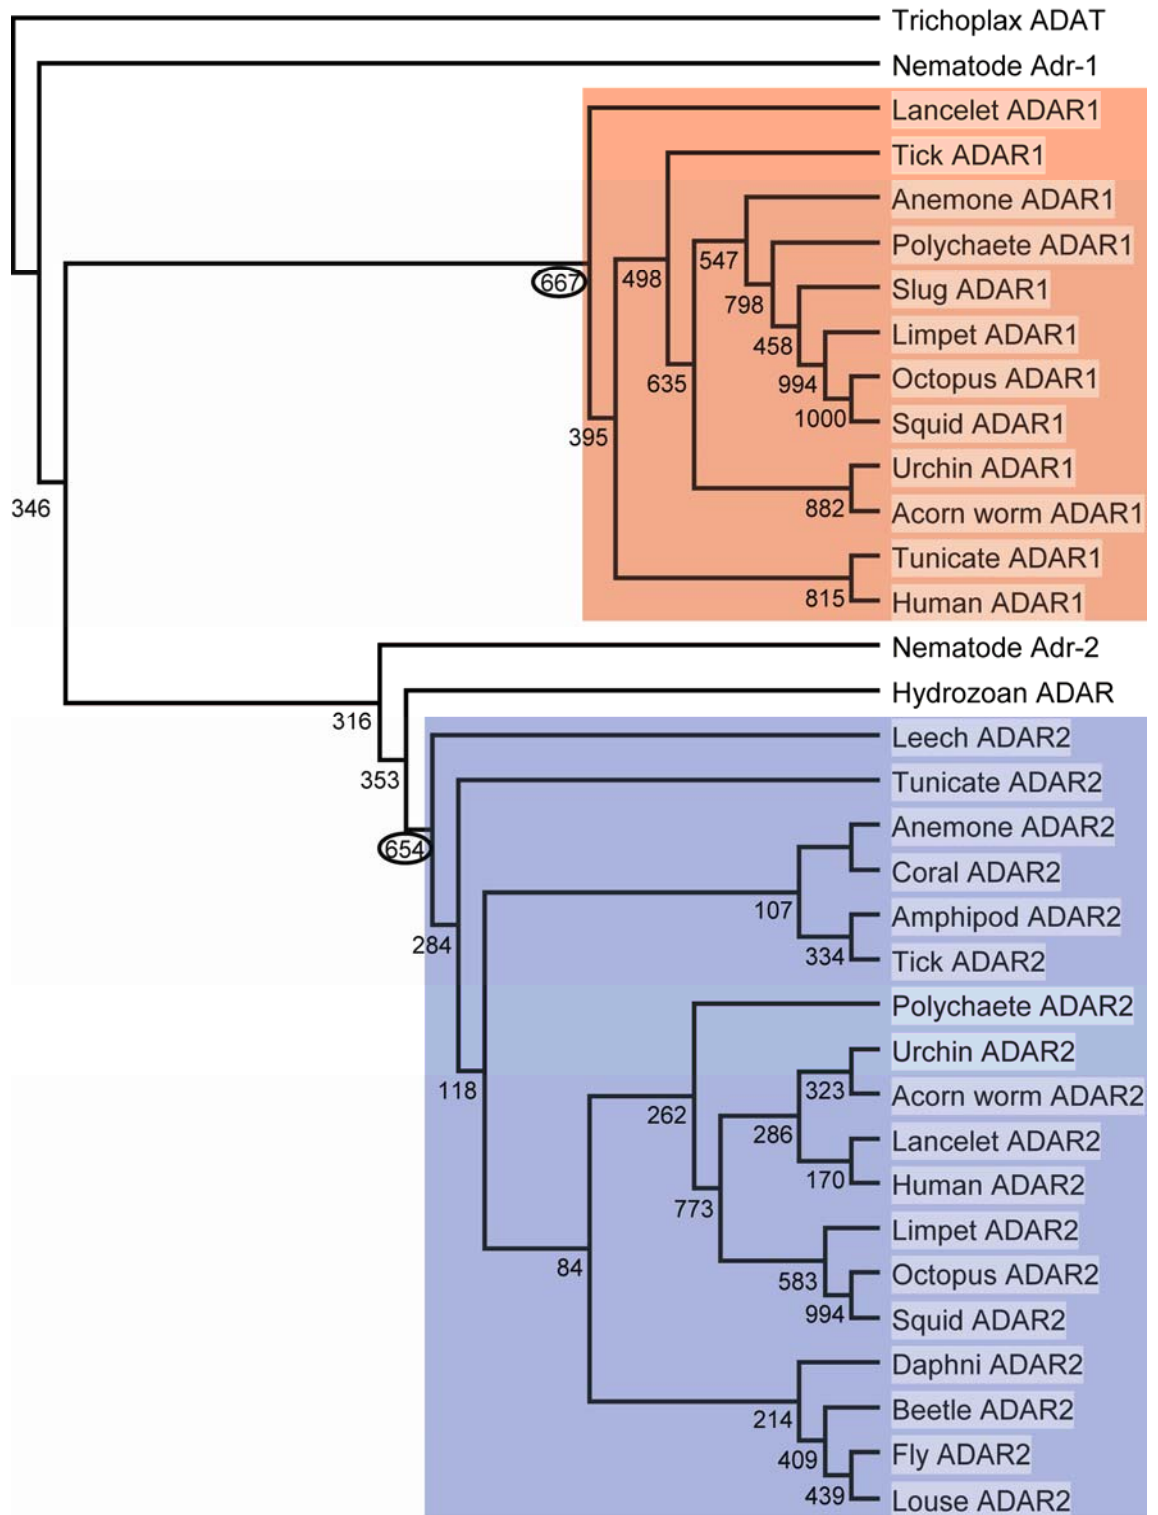

Figure S3
